# Supplementary material for: Male partner attendance at antenatal care and adherence to antenatal care guidelines: secondary analysis of 2011 Ethiopian demographic and health survey data
Source: Springer Nature journal article supplement (doi:10.1186/s12884-018-1775-4), 2018-05-09
Supplement: MOESM1 [file 15751128]

**Supplementary Table. Outcome and predictor variables in relation to the EDHS survey items**

| <i>Study variables and EDHS Survey Questions</i>                                                                                                                                                                                                                                              | <i>EDHS response categories</i>                                                                                                     | <i>Recoded response categories, where relevant</i>           |
|-----------------------------------------------------------------------------------------------------------------------------------------------------------------------------------------------------------------------------------------------------------------------------------------------|-------------------------------------------------------------------------------------------------------------------------------------|--------------------------------------------------------------|
| <b>Woman's questionnaire</b>                                                                                                                                                                                                                                                                  |                                                                                                                                     |                                                              |
| <i>Trimester began ANC*</i>                                                                                                                                                                                                                                                                   |                                                                                                                                     |                                                              |
| "How many months pregnant were you when you first received antenatal care for this pregnancy?"                                                                                                                                                                                                | Number/<br>Don't know                                                                                                               | 1=began in 1st trimester,<br>0=began in 2nd or 3rd trimester |
| <i>Number of ANC visits*</i>                                                                                                                                                                                                                                                                  |                                                                                                                                     |                                                              |
| "How many times did you receive antenatal care for this pregnancy?"                                                                                                                                                                                                                           | Number/<br>Don't know                                                                                                               | 1=attended 4+ ANC visits,<br>0=attended <4 ANC visits        |
| <i>Location of ANC visits</i>                                                                                                                                                                                                                                                                 |                                                                                                                                     |                                                              |
| "Where did you receive antenatal care for this pregnancy?"                                                                                                                                                                                                                                    | Your home,<br>other home/<br>Government hospital,<br>health centre,<br>health post,<br>other/<br>Private hospital,<br>clinic, other | 1=government facility<br>2=private facility                  |
| <i>Urine sample, Blood sample*</i>                                                                                                                                                                                                                                                            |                                                                                                                                     |                                                              |
| "As a part of your care this pregnancy were any of the following done at least once: Did you give a urine sample? Did you give a blood sample?"                                                                                                                                               | Y/N each<br>option<br>Don't know                                                                                                    | NA                                                           |
| <i>Told of complications*</i>                                                                                                                                                                                                                                                                 |                                                                                                                                     |                                                              |
| "During (any of) your antenatal care visit(s), were you told about things to look out for that might suggest problems with the pregnancy?"                                                                                                                                                    | Y/N/<br>Don't know                                                                                                                  | NA                                                           |
| <i>Mother age</i>                                                                                                                                                                                                                                                                             |                                                                                                                                     |                                                              |
| "How old were you at your last birthday?"                                                                                                                                                                                                                                                     | Age in years                                                                                                                        | NA                                                           |
| <i>Woman decision power</i>                                                                                                                                                                                                                                                                   |                                                                                                                                     |                                                              |
| "Who usually makes decisions about health care for yourself: you, your (husband/partner), you and your (husband/partner) jointly, or someone else?"                                                                                                                                           | Woman/<br>Partner/<br>Couple/<br>Someone else/<br>Other                                                                             | 1=woman<br>2=woman & partner<br>3=partner                    |
| <i>Region</i>                                                                                                                                                                                                                                                                                 |                                                                                                                                     |                                                              |
| Sampling domain determined by administration boundaries: Tigray, Afar, Amhara, Oromiya, Somali, Benishangul Gumuz, Southern Nations Nationalities and Peoples (SNNP), Gambella, Harari, Addis Ababa and Dire Dawa. Within each region participants allocated to either urban or rural status. |                                                                                                                                     | 1=Addis Ababa, 2=Other urban centre, 3=Rural                 |
| <i>Number of children</i>                                                                                                                                                                                                                                                                     |                                                                                                                                     |                                                              |
| Calculated by adding entries in mother's birth history (including children who have died after birth)                                                                                                                                                                                         |                                                                                                                                     | NA                                                           |
| <i>Wealth index</i>                                                                                                                                                                                                                                                                           |                                                                                                                                     |                                                              |
| Constructed from household assets and characteristics (42)                                                                                                                                                                                                                                    |                                                                                                                                     | NA                                                           |
| <i>Attitudes to wife beating</i>                                                                                                                                                                                                                                                              |                                                                                                                                     |                                                              |
| In your opinion, is a husband justified in hitting or beating his wife in the following situations:<br>If she goes out without telling him?                                                                                                                                                   | Y/N/<br>Don't<br>know                                                                                                               | 1=Violence acceptable in at least one condition              |

|                                                                                                                                  |                                |                                                          |
|----------------------------------------------------------------------------------------------------------------------------------|--------------------------------|----------------------------------------------------------|
| If she neglects the children?<br>If she argues with him?<br>If she refuses to have sex with him?<br>If she burns the food?       |                                | 0=Violence not acceptable in any condition               |
| <b>Man's questionnaire</b>                                                                                                       |                                |                                                          |
| <i>Male attendance at antenatal care</i>                                                                                         |                                |                                                          |
| (If men indicated their partner received antenatal care for most recent child) Were you ever present for any of those check-ups? | Y/N/<br>Don't know             | NA                                                       |
| <i>Education</i>                                                                                                                 |                                |                                                          |
| "What is the highest level of school you attended?"                                                                              | None/Primary/Secondary/ Higher | NA                                                       |
| <i>Exposure to media</i>                                                                                                         |                                |                                                          |
| "Do you read a newspaper/magazine?"                                                                                              | At least once p/wk/            | 1=At least once per week TV or radio or newspaper,       |
| "Do you watch TV?"                                                                                                               | Less than once p/wk/           | 0=less than once per week for TV and radio and newspaper |
| "Do you listen to the radio?"                                                                                                    | Not at all                     |                                                          |

\*Outcome variable
